# Supplementary material
Source: PubMed Central journal article supplement (PMC9255930)
Supplement: gbab110_suppl_supplementary_materials.pdf [file gbab110_suppl_supplementary_materials.pdf]

**Supplemental Information**

**Stepwise Poisson Regression Models with Robust Standard Errors Examining Changes to Daily Behaviors and Feelings of Depression about the COVID-19 Pandemic by Demographic Factors.**

|                                                           |        | Single,<br>Widowed,<br>Married or<br>Living with<br>Partner |                       | Divorced, or<br>Never<br>Married |                       | Not Living<br>Alone   |                       | Male                  | Female                | White                 | Non-White             | Age<75<br>Years | Age>74<br>Years |
|-----------------------------------------------------------|--------|-------------------------------------------------------------|-----------------------|----------------------------------|-----------------------|-----------------------|-----------------------|-----------------------|-----------------------|-----------------------|-----------------------|-----------------|-----------------|
| Changes to<br>Daily Behaviors <sup>†</sup>                |        | aPR (95%CI)                                                 | aPR (95%CI)           | aPR (95%CI)                      | aPR (95%CI)           | aPR (95%CI)           | aPR (95%CI)           | aPR (95%CI)           | aPR (95%CI)           | aPR (95%CI)           | aPR (95%CI)           | aPR (95%CI)     | aPR (95%CI)     |
| <b>Feelings of Depression about the COVID-19 Pandemic</b> |        |                                                             |                       |                                  |                       |                       |                       |                       |                       |                       |                       |                 |                 |
| Sleep Quality                                             | Worse  | <b>2.0 (1.6 -2.6)</b>                                       | <b>2.0 (1.5 -2.7)</b> | <b>1.9 (1.3 -2.7)</b>            | <b>2.1 (1.5 -2.8)</b> | <b>2.3 (1.5 -3.5)</b> | <b>1.9 (1.5 -2.5)</b> | <b>1.9 (1.6 -2.3)</b> | <b>2.4 (1.7 -3.3)</b> | <b>1.8 (1.3 -2.5)</b> | <b>2.1 (1.8 -2.6)</b> |                 |                 |
|                                                           | Better | 2.2 (1.2 -3.9)                                              | 0.7 (0.3 -1.6)        | 0.9 (0.4 -2.2)                   | 1.1 (0.5 -2.6)        | 1.1 (0.4 -2.9)        | 1.0 (0.5 -2.1)        | 1.3 (0.8 -2.1)        | <b>0.0 (0. -0.0)</b>  | 0.9 (0.3 -2.3)        | 1.0 (0.6 -1.9)        |                 |                 |
| Sleep Duration                                            | Less   | <b>1.5 (1.1 -2.)</b>                                        | <b>1.5 (1.0 -2.2)</b> | <b>1.7 (1.1 -2.6)</b>            | <b>1.4 (0.9 -2.)</b>  | 1.3 (0.6 -2.7)        | <b>1.5 (1.1 -2.1)</b> | <b>1.8 (1.4 -2.3)</b> | 1.2 (0.7 -1.8)        | 1.4 (0.9 -2.4)        | <b>1.6 (1.2 -2.)</b>  |                 |                 |
|                                                           | More   | <b>1.5 (1.2 -1.9)</b>                                       | <b>1.5 (1.1 -1.9)</b> | <b>1.8 (1.3 -0.5)</b>            | <b>1.3 (1.0 -1.7)</b> | <b>1.6 (1.2 -2.3)</b> | <b>1.4 (1.1 -1.8)</b> | <b>1.6 (1.3 -1.9)</b> | 1.0 (0.7 -1.5)        | <b>1.7 (1.2 -2.3)</b> | <b>1.4 (1.2 -1.7)</b> |                 |                 |
| TV                                                        | Less   | 0.8 (0.4 -1.5)                                              | 1.0 (0.6 -1.7)        | 0.9 (0.5 -0.8)                   | 0.9 (0.5 -1.7)        | 1.1 (0.5 -2.5)        | 0.9 (0.5 -1.5)        | 1.1 (0.7 -1.7)        | 0.7 (0.4 -1.5)        | 0.6 (0.3 -1.4)        | 1.1 (0.7 -1.7)        |                 |                 |
|                                                           | More   | <b>1.4 (1.1 -1.7)</b>                                       | 1.2 (1.0 -1.5)        | 1.2 (0.9 -1.6)                   | 1.3 (1.1 -1.6)        | 1.2 (0.9 -1.7)        | <b>1.3 (1.1 -1.6)</b> | <b>1.3 (1.1 -1.6)</b> | 1.1 (0.8 -1.5)        | 1.2 (0.9 -1.6)        | <b>1.3 (1.1 -1.6)</b> |                 |                 |
| Walk                                                      | Less   | <b>1.4 (1.1 -1.7)</b>                                       | <b>1.5 (1.2 -1.9)</b> | <b>1.4 (1.0 -0.8)</b>            | <b>1.5 (1.2 -1.9)</b> | <b>1.5 (1.1 -2.1)</b> | <b>1.4 (1.1 -1.7)</b> | <b>1.4 (1.2 -1.7)</b> | <b>1.5 (1.1 -2.)</b>  | <b>1.3 (1.0 -1.8)</b> | <b>1.5 (1.2 -1.7)</b> |                 |                 |
|                                                           | More   | 1.0 (0.7 -1.3)                                              | 1.1 (0.7 -1.6)        | 1.1 (0.7 -0/7)                   | 1.0 (0.7 -1.4)        | 1.3 (0.9 -2.1)        | 0.9 (0.6 -1.3)        | 1.0 (0.8 -1.3)        | 1.0 (0.6 -1.8)        | 1.0 (0.7 -1.5)        | 1.0 (0.8 -1.4)        |                 |                 |
| <b>Feelings of Anxiety about the COVID-19 Pandemic</b>    |        |                                                             |                       |                                  |                       |                       |                       |                       |                       |                       |                       |                 |                 |
| Sleep Quality                                             | Worse  | <b>1.9 (1.4-2.6)</b>                                        | <b>1.9 (1.4-2.6)</b>  | <b>1.9 (1.3-2.6)</b>             | <b>1.9 (1.5-2.5)</b>  | <b>1.6 (1.1-2.5)</b>  | <b>2.0 (1.6-2.6)</b>  | <b>1.9 (1.6-2.3)</b>  | <b>1.8 (1.4-2.5)</b>  | <b>2.1 (1.6-2.7)</b>  | <b>1.8 (1.5-2.1)</b>  |                 |                 |

|              |        |                      |                      |                      |                      |                      |                      |                      |                      |               |                      |
|--------------|--------|----------------------|----------------------|----------------------|----------------------|----------------------|----------------------|----------------------|----------------------|---------------|----------------------|
|              | Better | 1.8 (0.8-3.8)        | 0.6 (0.3-1.5)        | 0.7 (0.3-2.0)        | 1.1 (0.6-2.3)        | 1.1 (0.5-2.5)        | 0.8 (0.4-1.8)        | 1.3 (0.8-2.1)        | <b>0.0 (0.-0.0)</b>  | 1.6 (0.9-2.9) | 0.6 (0.3-1.4)        |
| Sleep Amount | Less   | 1.2 (0.8-1.9)        | 1.1 (0.8-1.7)        | 1.3 (0.8-1.9)        | 1.1 (0.8-1.6)        | 1.1 (0.5-2.1)        | 1.2 (0.9-1.6)        | <b>1.4 (1.1-1.8)</b> | 0.8 (0.6-1.3)        | 1.3 (0.9-1.9) | 1.2 (0.9-1.5)        |
|              | More   | <b>1.4 (1.1-1.7)</b> | 1.1 (0.8-1.4)        | 1.2 (0.9-1.6)        | 1.2 (1.0-1.5)        | <b>1.4 (1.-1.8)</b>  | 1.1 (0.8-1.4)        | <b>1.2 (1.-1.4)</b>  | <b>1.2 (0.9-1.6)</b> | 1.2 (0.9-1.6) | 1.2 (1.0-1.4)        |
| TV           | Less   | 0.7 (0.4-1.5)        | 0.8 (0.4-1.4)        | 0.6 (0.3-1.3)        | 0.9 (0.5-1.5)        | 0.9 (0.4-1.9)        | <b>0.7 (0.4-1.2)</b> | 0.8 (0.5-1.3)        | 0.7 (0.4-1.3)        | 0.7 (0.4-1.4) | 0.7 (0.5-1.2)        |
|              | More   | <b>1.3 (1.1-1.7)</b> | <b>1.4 (1.1-1.8)</b> | <b>1.5 (1.1-1.9)</b> | <b>1.4 (1.1-1.6)</b> | <b>1.4 (1.-1.7)</b>  | <b>1.4 (1.2-1.7)</b> | <b>1.4 (1.2-1.7)</b> | 1.3 (1.0-1.6)        | 1.3 (1.0-1.6) | <b>1.4 (1.2-1.6)</b> |
| Walk         | Less   | <b>1.4 (1.1-1.7)</b> | <b>1.4 (1.2-1.8)</b> | <b>1.3 (1.0-1.7)</b> | <b>1.5 (1.2-1.8)</b> | <b>1.4 (1.1-1.8)</b> | <b>1.4 (1.2-1.7)</b> | <b>1.4 (1.2-1.6)</b> | <b>1.3 (1.0-1.6)</b> | 1.2 (1.0-1.5) | <b>1.5 (1.3-1.7)</b> |
|              | More   | 1.2 (0.9-1.5)        | 1.1 (0.7-1.5)        | 1.0 (0.7-1.6)        | 1.2 (0.9-1.5)        | 1.2 (0.8-1.7)        | 1.1 (0.8-1.5)        | 1.2 (1.-1.5)         | 0.9 (0.6-1.4)        | 0.9 (0.7-1.2) | 1.2 (1.0-1.6)        |

†Bold indicates significance at the p<0.05 level.
